# Supplementary material for: Identification and validation of regulatory SNPs that modulate transcription factor chromatin binding and gene expression in prostate cancer
Source: PubMed Central journal article supplement (PMC5338917; doi:10.18632/oncotarget.10520), 2016-07-09
Supplement: oncotarget-07-54616-s001.pdf [file oncotarget-07-54616-s001.pdf]

## Identification and validation of regulatory SNPs that modulate transcription factor chromatin binding and gene expression in prostate cancer

### Supplementary Materials

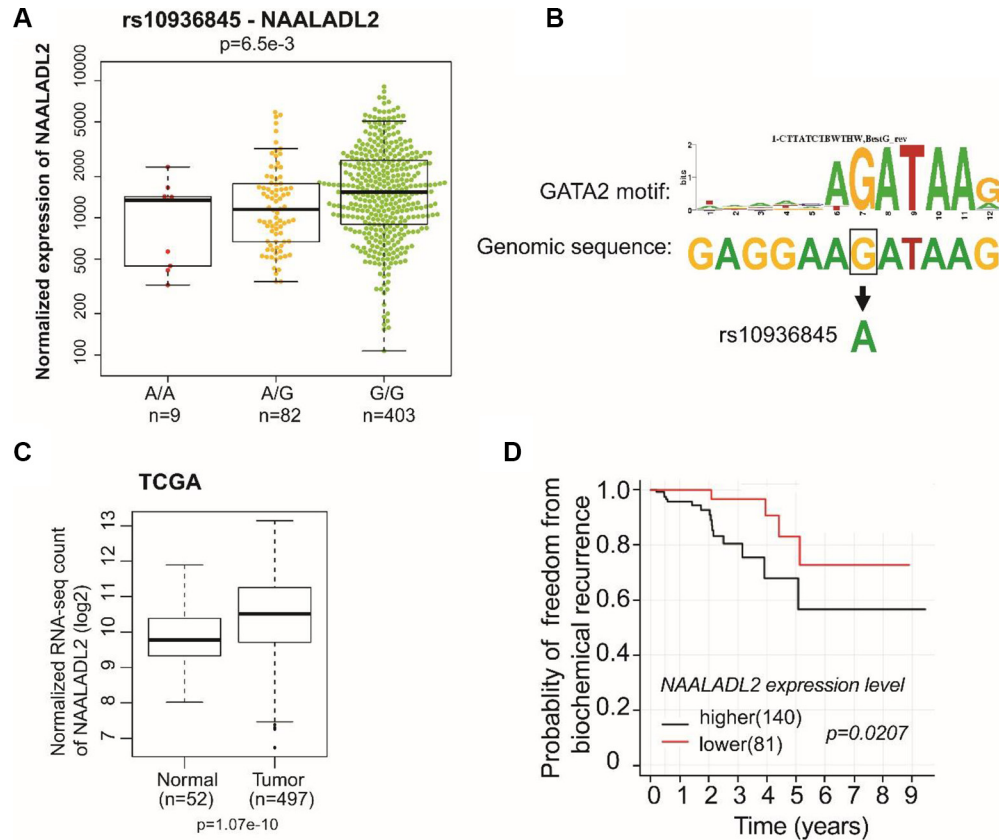

**Supplementary Figure S1: Association between rs10936845 genotype, GATA2 motif, NAALADL2 expression and PCa risk.** (A) The expression of NAALADL2 mRNA in patients is associated with rs6057110 genotypes. *P* value is calculated based on Student's *t*-test. (B) The A allele at rs6057110 disrupts a canonical GATA2 motif. (C) NAALADL2 mRNA levels in TCGA data set. NAALADL2 is marginally significantly upregulated in PCa compared with benign or normal prostate samples. (D) Higher NAALADL2 transcriptional activity is associated with shorter BCR-free survival in TCGA PCa dataset. *P* value is estimated based on the log-rank test.

**Supplementary Table S1: SNP-gene pairs from combinatory eQTL and motif analysis.** See Supplementary\_Table\_S1

**Supplementary Table S2: Genes showed significantly different expression in tumors relative to normal**

| SNP ID     | Gene     | Mean_Normal | Mean_Tumor | p value    |
|------------|----------|-------------|------------|------------|
| rs2011345  | FMO4     | 214.7       | 131.3      | 1.5346E-11 |
| rs13395911 | EFHD1    | 973.4       | 410.5      | 1.0458E-06 |
| rs6760963  | MLPH     | 11171.6     | 17099.7    | 2.0094E-13 |
| rs6702939  | GIPC2    | 182.5       | 60.4       | 6.662E-09  |
| rs10936845 | NAALADL2 | 879.6       | 1464.6     | 1.0745E-10 |
| rs2659051  | KLK15    | 53.5        | 192.8      | 9.4027E-09 |
| rs12360799 | LYVE1    | 257.8       | 56.2       | 0.00073465 |

**Supplementary Table S3: Oligonucleotides used in this study**

| Name            | sequence (5'→3')          | Application                         |
|-----------------|---------------------------|-------------------------------------|
| GAPDH F1        | TGCACCACCAACTGCTTAGC      | RT-qPCR                             |
| GAPDH R1        | GGCATGGACTGTGGTCATGAG     | RT-qPCR                             |
| KLK3 pF1        | GCCTGGATCTGAGAGAGATATCATC | ChIP-qPCR                           |
| KLK3 pR1        | ACACCTTTTTTTTTCTGGATTGTTG | ChIP-qPCR                           |
| UPK3A F1        | CCATACTCGACGATCGACAC      | RT-qPCR                             |
| UPK3A R1        | TCGTTTCCCATCAGAACTC       | RT-qPCR                             |
| rs2742624_gt_F3 | TCTGAGCTGGGCTTTAAGA       | genotyping PCR, cloning             |
| rs2742624_gt_R1 | CTGCCACAGAAATGCACTGT      | genotyping PCR, cloning, sequencing |
| rs2742624_pF1   | GCAGCCCTGTTCAAGAGTTC      | ChIP-qPCR                           |
| rs2742624_pR1   | CCTCTTTGGGTGTCGGTTTA      | ChIP-qPCR                           |
| rs9925556 pF1   | CCACCTCTGCCATTCAAGTC      | ChIP-qPCR, cloning, sequencing      |
| rs9925556 pR1   | CTCCCGGATGTGCAGTATT       | ChIP-qPCR, cloning                  |
| rs6057110_157f  | CACTTGTGGGTGAGCTGAAA      | ChIP-qPCR, cloning, sequencing      |
| rs6057110_157r  | TGCATCTGTGAACTGGCAAT      | ChIP-qPCR, cloning                  |
| rs2659051 pF1   | AGGCTGGGTTTTGTATCCCA      | ChIP-qPCR                           |
| rs2659051 pR1   | TCAGGAGACAGGCAGAAAGG      | ChIP-qPCR                           |
| rs10936845 pF1  | AAGGTGCACAGAGGCAAGTC      | ChIP-qPCR                           |
| rs10936845 pR1  | AGGCAGCCCAATGTAATAGC      | ChIP-qPCR                           |
| sgRNA_1F        | CACCGACCTGCAGTTTATCAGAGGC | guide RNA for CRISPR                |
| sgRNA_1R        | AAACGCCTCTGATAAACTGCAGGTC | guide RNA for CRISPR                |
| sgRNA_2F        | CACCGCATCCGCTCTCTGCATGTCA | guide RNA for CRISPR                |
| sgRNA_2R        | AAACTGACATGCAGAGAGCGGATGC | guide RNA for CRISPR                |

**Supplementary Table S4: Prostate cancer-specific regulatory regions identified in this study.** See Supplementary\_Table\_S4

**Supplementary Table S5: All SNPs present in regulatory regions.** See Supplementary\_Table\_S5

**Supplementary Table S6: SNP-gene pairs from eQTL analysis.** See Supplementary\_Table\_S6
